1 **RSV-Related Healthcare Burden: A Prospective Observational Study in a resource-constrained**  
2 **setting**

3

4 **Authorship contributors**

5

6 Senjuti Saha PhD<sup>1#</sup>, Sudipta Saha SM<sup>1,2</sup>, Naito Kanon MSc<sup>1</sup>, Yogesh Hooda PhD<sup>1</sup>, Mohammad  
7 Shahidul Islam PhD<sup>1</sup>, Shuborno Islam BSc<sup>1</sup>, Zabed Bin Ahmed MSc<sup>1</sup>, Md Jahangir Alam FCPS<sup>3</sup>,  
8 Ataul Mustufa Anik MSc<sup>1</sup>, Probir K Sarkar FCPS<sup>3</sup>, Mohammed Rizwanul Ahsan, DCH<sup>4</sup>, Md. Ruhul  
9 Amin FCPS<sup>1</sup>, Samir K Saha PhD<sup>1,5</sup>

10

11 1. Child Health Research Foundation, Dhaka, Bangladesh

12 2. Department of Social and Behavioural Sciences, Harvard T. H. Chan School of Public Health,  
13 Boston, USA

14 3. Department of Pediatric Respiratory Medicine (Pulmonology), Bangladesh Shishu Hospital  
15 and Institute, Dhaka, Bangladesh

16 4. Department of Emergency, Observatory and Referral, Bangladesh Shishu Hospital and  
17 Institute, Dhaka, Bangladesh

18 5. Department of Microbiology, Bangladesh Shishu Hospital and Institute, Dhaka, Bangladesh

19

20 Correspondence to

21

22 Senjuti Saha, PhD

23 Deputy Executive Director

24 Child Health Research Foundation

25 23/3 Khilji Road, Mohammadpur

26 Dhaka 1207, Bangladesh

27 Email: [senjutisaha@chrfd.org](mailto:senjutisaha@chrfd.org)

28

29 **Abstract**

30 **Background:** Respiratory syncytial virus (RSV) is a leading cause of pediatric hospitalizations  
31 globally, impacting overstretched health systems. Comprehensive data is vital for informing RSV  
32 vaccination policies.

33  
34 **Methods:** From January to December 2019, a prospective study was conducted at Bangladesh's  
35 largest pediatric hospital to evaluate RSV's burden on the health system. We analyzed  
36 hospitalization rates, lengths of stay, and outcomes for children under five using WHO criteria  
37 and qPCR testing. We also examined survival probability for children denied admission due to  
38 bed shortages, compared with those admitted using the Kaplan-Meier method, and estimated  
39 the effects of a maternal vaccine using Monte-Carlo simulations.

40  
41 **Findings:** Out of 40,664 children admitted, 31,692 were under five. Of these, 19,940 were  
42 eligible for study inclusion with 7,191 meeting inclusion criteria; 6,149 (86%) had samples  
43 taken, with 1,261 (21%) testing positive for RSV. The hospital incidence rate was 465 per 10,000  
44 admissions. The median age of RSV patients was 3 months, with a median stay of 5 days. RSV  
45 accounted for 8,274 bed days of the total 151,110 observed bed days. In-hospital mortality was  
46 1.9%, increasing to 9.9% during a 90-day follow-up over telephone. Additionally, 9,169 children  
47 were denied admission during the study period; of these, 5,969 under-five children were  
48 approached, and outcomes of 2,850 admitted versus 3,928 refused were followed. The hazard  
49 ratio for death was 1.37 for refused versus admitted children, highest within neonates at 1.7. A  
50 70% efficacious vaccine would equate to adding 50 hospital beds and averting 195 deaths.

51  
52 **Interpretation:** RSV significantly contributes to pediatric hospitalizations in Bangladesh,  
53 exacerbating healthcare burdens and increasing mortality risks. Maternal vaccination could  
54 significantly reduce both direct and indirect RSV burdens, enhancing healthcare capacity and  
55 benefiting overall child health in resource-limited settings.

56  
57 **Funding:** Bill and Melinda Gates Foundation

## 58 Introduction

59

60 Respiratory syncytial virus (RSV) is the leading cause of acute lower respiratory infection in  
61 young children. Annually, RSV infections are estimated to result in 33 million episodes, 3.6  
62 million hospitalizations, and 26,300 deaths<sup>1</sup>. Low- and middle-income countries (LMICs) bear a  
63 disproportionate burden of the disease, where over 95% of RSV infections and more than 97%  
64 of RSV-attributable deaths occur<sup>1</sup>.

65

66 Emerging interventions, such as maternal vaccines and long-acting monoclonal antibodies,  
67 promise to reduce RSV-related morbidity and mortality<sup>2-4</sup>. There is also growing evidence  
68 suggesting that these interventions might have broader benefits, like reducing respiratory  
69 illnesses caused by other pathogens, decreasing recurrent hospitalizations, and improving lung  
70 health<sup>5-7</sup>. Policymakers across countries are grappling with decisions about introduction, and  
71 which groups should be prioritized for these interventions. Making informed decisions  
72 necessitates up-to-date and locally relevant epidemiological data. However, there exist large  
73 data gaps from LMICs.

74

75 In Bangladesh, a densely populated lower-middle income country, with a birth cohort of almost  
76 3 million<sup>8</sup> the healthcare system faces unique challenges due to the high burden of  
77 communicable and non-communicable diseases<sup>9</sup>. Data from the country's largest pediatric  
78 hospital indicate that approximately 20% of children needing hospitalization—whether for  
79 communicable or non-communicable diseases—have to be turned away due to bed shortages  
80<sup>10</sup>. Timely and appropriate care is vital for child survival and well-being. In settings where  
81 healthcare resources are stretched thin, a high RSV burden can exacerbate capacity issues,  
82 potentially leading to adverse health outcomes for children who cannot be admitted for various  
83 reasons. Thus, it is imperative to consider both the direct and indirect effects of RSV infections  
84 on child health and the broader health system when making informed policy decisions.

85

86 Two prominent multi-country studies, Aetiology of Neonatal Infections in South Asia (ANISA)<sup>11</sup>,  
87 and Pneumonia Etiology Research for Child Health (PERCH)<sup>12</sup>, have highlighted RSV as a  
88 primary etiological agent in sepsis and respiratory tract infections in Bangladesh and other  
89 countries in Asia and Africa. While these studies underscore RSV's role in community-based  
90 child morbidity, gaps remain in understanding the extent of RSV-associated hospitalizations and  
91 the broader impact on the healthcare capacity in resource-constrained settings.

92

93 To address the current gaps in data and estimate the potential impact of RSV vaccines, we  
94 conducted a prospective, observational study at Bangladesh's largest pediatric hospital. We  
95 aimed to quantify RSV-associated hospitalizations, bed usage, and outcomes. We also assessed  
96 the wider health implications for children denied admission due to bed shortages, providing  
97 crucial data to inform policy and intervention strategies.

98

## 99 **Methods**

100

### 101 Ethical considerations

102 This study was approved by the ethical review board of the Bangladesh Shishu Hospital and  
103 Institute (BSHI). We obtained written informed consent from guardians of children admitted in  
104 the hospital from whom nasopharyngeal samples were collected. We obtained informed verbal  
105 consent from caregivers when they were registered in the study after hospital admission refusal  
106 for telephone follow up. We also obtained informed verbal consent from caregivers of admitted  
107 patients selected for follow-up over telephone.

108

### 109 Study Design and Setting

110 From January to December 2019, we conducted a prospective observational surveillance at the  
111 BSHI, previously known as Dhaka Shishu Hospital (DSH), located in Dhaka, Bangladesh. BSHI,  
112 with its 653-bed capacity (2019), is Bangladesh's largest pediatric hospital. It offers primary to  
113 tertiary care for patients up to 18 years old. Admission decisions for the in-patient department  
114 (IPD) are made by physicians in the Emergency Room (ER).

115

116 This study had two main components: (i) active surveillance within the IPD to detect RSV  
117 infections; and (ii) active surveillance of health outcomes of patients who had to be denied  
118 hospitalization due to bed shortages in the IPD, despite needing hospitalization, and a control  
119 group of patients who were admitted in the IPD.

120

### 121 RSV Surveillance in the IPD

122 Children aged 0–59 months admitted to the wards selected for the study with 414 beds were  
123 evaluated by study physicians using the WHO RSV hospital-based surveillance case definition<sup>13</sup>  
124 (Text S1, appendix page 3). The remaining 239 beds of the total 653 were not selected because  
125 they were in wards that do not admit patients with possible infectious diseases (surgery,  
126 nephrology, oncology and cardiology wards). Eligible children were enrolled in the study after  
127 obtaining written consent from caregivers and obtaining a nasopharyngeal swab sample.  
128 Nasopharyngeal swabs were collected by trained nurses and tested using established qPCR  
129 methods (Text S2, appendix page 3).

130

### 131 Refusal Surveillance in the ER

132 Upon arrival at BSHI, families with children potentially needing hospitalization are triaged to the  
133 Emergency Room (ER). Here, a physician evaluates the child's condition to determine if  
134 immediate hospitalization is necessary. Beds are available on a first come first serve basis. If the  
135 physician decides that the child requires hospitalization, but no beds are available, families are  
136 referred or advised to seek care elsewhere. During this study, when a child was refused  
137 admission due to bed shortages despite requiring hospitalization, trained research assistants  
138 documented the ER physician's diagnosis for the patients, and upon obtaining verbal consent  
139 from the caregiver, they collected basic details, including the child's age, family address, and  
140 contact numbers.

141

### 142 Health Outcome Follow-Up

143 Among the <5 y children refused admission due to shortage of beds and whose contact  
144 information was obtained, families were selected using a computer-based randomization  
145 algorithm, and contacted via telephone approximately 2 weeks after hospital-refusal, and the  
146 child's health status ("alive" or "deceased"), and date of death (if applicable) was recorded  
147 based on caregivers' response. If the child was alive during the 2-week follow-up, a second  
148 follow-up call was made three months post refusal. In parallel, from the cohort of children <5  
149 years who were admitted during the same time, children were randomly chosen for follow-up  
150 in the same manner. Additional information on in-hospital mortality was obtained from hospital  
151 records.

152  
153 Survival curves were computed using the Kaplan-Meier method. Date of death was collected  
154 during follow-up, or from hospital records for admitted cases. Conservative censoring  
155 assumptions were made – children refused admission and not followed-up at 14-days were  
156 considered censored at day 0, and those not followed up at 90-days were considered censored  
157 at 14-days (last successful contact). Admitted children's censoring time was dealt with similarly,  
158 except that hospital discharge (either alive or through mortality) was additional information.  
159 Multivariate Cox Proportional-Hazards models were used to estimate hazard ratios adjusted for  
160 diagnosis cluster (Table S1, appendix page 5), age in months, and sex. We also obtained  
161 stratified estimates of hazard ratios.

162  
163 *Estimated impact of RSV maternal vaccine impact analysis (Monte Carlo Simulation)*

164  
165 A Monte Carlo simulation was conducted to estimate the direct and indirect effects of RSV  
166 vaccination on hospital admissions and 90-day mortality. The simulation used empirical data on  
167 the total number of children requiring admission in 2019 across all age groups and diagnoses,  
168 length of stay, and estimated 90-day survival probabilities among refused and admitted cases  
169 based on follow-up. We explored the impact on total deaths within 3 months of hospital  
170 admission or refusal when a fixed number of beds were occupied under a baseline scenario  
171 reflecting the empirical data. Additionally, scenarios with various reductions in the number of

172 RSV cases were simulated. The median value across 1000 simulations and the 95% prediction  
173 intervals are reported. Further methodological details are provided in Text S3, appendix page 4.

174

#### 175 Role of funding source

176 The funder had no role in study design, data collection, data analysis, data interpretation,  
177 writing of the report, or the decision to submit this manuscript. The corresponding authors had  
178 full access to all the data in the study and had final responsibility for the decision to submit for  
179 publication.

180

## 181 **Results**

182

### 183 Cases hospitalized with RSV:

184

185 In 2019, a total of 49,833 children sought care at BSHI and were advised admission, of whom  
186 40,664 could be admitted based on the available beds (Figure 1, Table 1). 31,692 of them were  
187 <5, and of them 19,940 were admitted in the screening wards. Of them, 7,191 met the inclusion  
188 criteria of the study, and a sample was successfully collected from 6,149 (86%) of these  
189 children. Samples could not be collected from the remaining 1,042 eligible cases due to various  
190 reasons including the guardian's refusal to participate in the study, use of oxygen mask, and  
191 discharge before enrollment or sample collection (Table S2, appendix page 5)). 92%  
192 (5658/6149) of all samples were collected within 72 hours of hospitalization (Table S3, appendix  
193 page 6).

194

195 All 6,149 samples were tested for the presence of RSV using qPCR, and of them 1,261 (21%)  
196 samples tested positive. Assuming 1,042 untested eligible cases among 7191 had the same  
197 positivity as those tested, the overall proportion of all hospital admissions that were RSV  
198 positive was 4.65% or 465 RSV cases per 10,000 <5 hospitalizations (95% CI: 443 to 489).

199

200 The highest number of patients were enrolled in the study between June and September  
201 (Figure 2A), and these four months accounted for over 70% of the total RSV-positive cases  
202 (882/1261) (Figure 2B). During July, August and September, more than 20% of the 414 beds  
203 were due to RSV positive cases (Figure 2C).

204  
205 Of the positive cases, 30.6% were females. The median age of PCR-confirmed RSV cases was 3  
206 months (IQR 1.3, 8.3 days) and 70% (881 of 1261) of the cases were within the first six months  
207 (Fig 3A, Table 1)). Notably, 17% of infections occurred in the first 4 weeks of life, highlighting  
208 the vulnerability of very young babies to RSV. Median hospital stay of RSV cases was 5 days (IQR  
209 4 – 8), and medial stay of all RSV-negative cases and non-tested cases were 4 days (IQR 2 – 7).  
210 Throughout the year, RSV cases accounted for 8,274 (5.5%) of the total 151,110 bed days  
211 observed.

212 Of the positive cases, 24 cases (1.9%) died during their stay at the hospital (Table 1). Median  
213 age of these cases was 130 days (IQR 77 - 175) and died between 0 - 26 days of hospitalization.

214

#### 215 *Impact of Bed Shortages on Non-Admitted Patients*

216

217 During the study period, of the total 49,833 children requiring hospitalization, the hospital was  
218 unable to admit 9,169 (18.4%) patients requiring admission due to lack of beds (Figure 1). Of  
219 them, we were able to approach and collect contact information of 5,969 families for follow-up;  
220 3,200 patients were not approached because they either came to the hospital at night when  
221 the study research assistants were absent (n = 2,324) or were >5 years of age (n = 876). Of the  
222 families who provided verbal consent and contact information for telephone follow-up, a  
223 random selection of 3,928 (43%) patients were chosen for follow-up. Out of these, 3,435 (87%)  
224 could be successfully contacted and followed up at 2 weeks. The primary reasons for missing  
225 follow-up included switched-off mobile phones, incorrect phone numbers, or no response to  
226 the call (Table S4, appendix page 6). During the first follow up, 2931 (85.3%) children were  
227 reported to be alive by their guardian, and 504 (14.7%) were reported to have died. Of the  
228 2,931 patients alive, 2631 (89.8%) could be subsequently contacted during the 3-month follow



229 up, and 2525 (96%) were reported to be alive, and an additional 106 (4%) had died. The survival  
230 probability at the end of follow up was 0.805 [95% CI: 0.791, 0.819] for refused patients (Figure  
231 4a).

232  
233 During the same time, 2,850 admitted <5-year children were randomly selected for follow-up.  
234 Of them, 2,527 (89%) were successfully followed up at 2 weeks. Reasons for unsuccessful follow  
235 up included those above, in addition to missing contact information in the hospital records  
236 (Supplementary table 6). During the first follow up, 2302 (91.1%) children were reported to be  
237 healthy, and 225 (8.9%) were reported to have died. Of the 2,302 patients alive 1,965 (85.3%)  
238 could be subsequently contacted during the 3-month follow up, of which 1,883 (95.8%) were  
239 alive, and an additional 82 (4.2%) had died (Figure 4). The survival probability at the end of  
240 follow up was 0.874 [95% CI: 0.861, 0.887] among those admitted (Figure 4a).

241  
242 Overall comparison between the two groups revealed a hazard ratio (HR) of 1.69 (CI 1.48 - 1.94)  
243 of death in children who were refused admission compared to children who were admitted  
244 (Table 3). The HR was 1.37 (CI 1.56 - 1.79) in models adjusted for age, diagnosis and sex. Models  
245 stratified by age groups showed that HR of death was significantly greater for refused cases  
246 among babies in their first month of life (neonates) (HR 1.93 [CI 1.62 - 2.30]) but not in other  
247 age groups. When stratified by diagnosis, HR of death was significantly greater among those  
248 with perinatal asphyxia (HR 2.22 [1.68, 2.92]), systemic infections (HR 1.79 [1.13, 2.85]), and  
249 preterm low-birth weight 1.85 [1.32, 2.59].

250

#### 251 Post-hospitalization RSV-associated mortality

252 While the study was not designed to specifically follow-up RSV positive cases, of the 2,527  
253 admitted children randomly selected and successfully followed up, there were 205 RSV positive  
254 cases. Of these, 18 children died within the 90-day follow-up period. Their median age was  
255 107.5 days (IQR 44.75 - 157) Considering both in-hospital mortality of all RSV admissions and  
256 mortality during follow-up of a subset of cases revealed that survival decreased substantially

257 over time, with a 90-day survival probability of 0.901 [95% CI: 0.865, 0.938] at the end of the  
258 follow-up period (Figure 4b).

259

### 260 Potential Impact of Maternal RSV Vaccination

261

262 In a Monte Carlo simulation of hospital admissions and refusals for the baseline scenario, based  
263 on the empirical data and a 650-bed capacity, on average, 49,968 children required admissions  
264 (95% prediction intervals (PI): 49,500, 50,379), and 9,221 (95% PI: 8,869, 9,760) cases were  
265 refused admission over the course of the year. This was in concordance with the true burden of  
266 total cases requiring admission and refusals – 49,833 and 9,169 respectively. In the vaccine  
267 scenario with 70% reduction in RSV cases requiring admission, 48,895 (95% PI: 48,514, 49,315)  
268 cases required admission, and 8,103 cases were refused (7,728, 8,695) – a 16.6% refusal rate.  
269 Even though total cases requiring admissions in this scenario remained as high as 97.9%  
270 (48895/49968) of the baseline scenario, the number of refused cases was 87.8% (8103/9221),  
271 due to the freeing up of bed spaces. Figure 5 demonstrates the effects of a 70% reduction in  
272 RSV admissions through vaccination, showing its impact on deaths and hospital bed utilization.  
273 The plot compares mortality with increase in available beds, demonstrating how reducing RSV  
274 cases is akin to increasing bed capacity. Overall, there were 7,002 deaths (6829, 7167) in the  
275 baseline scenario, and 6807 deaths (6629, 6930) in the vaccine scenario, a difference of 195  
276 deaths. A reduction in RSV cases was found to decrease both hospital RSV incidence and the  
277 overall number of RSV cases seeking admission at the hospital. The estimated reduction in  
278 deaths with the 70% efficacious vaccine would be equivalent of adding roughly 50 beds to the  
279 hospital although, there is considerable overlap of the variability in the estimates from the  
280 different scenarios.

281

### 282 **Discussion**

283 Informed decision-making on interventions to prevent RSV infections in young infants requires  
284 contemporary and locally relevant epidemiological data. Our study demonstrates the significant

285 impact of RSV on healthcare resources in Bangladesh, a country characterized by a high burden  
286 of infectious diseases and a substantial demand for pediatric care amidst resource limitations.

287  
288 Our study recorded an overall RSV positivity rate of 21% among the 6,149 patients admitted to  
289 the largest pediatric hospital of Bangladesh with respiratory illnesses, corresponding to an RSV  
290 hospital incidence of 465 per 10,000 <5 admissions. The median age of confirmed RSV cases  
291 was 3 months. These findings are concordant with those of the PERCH study that reported that  
292 in Bangladesh 31.2% of children hospitalized with respiratory tract infections tested positive for  
293 RSV<sup>12</sup>.

294 The in-hospital mortality rate for RSV-positive cases was 1.6%, which escalated to 9.9% during  
295 the 90-day follow-up of discharged patients. The median age of recorded RSV-associated  
296 deaths was 4.2 months. These data are comparable to a Zambian study that found RSV in 9% of  
297 community deaths and 5% of in-hospital deaths<sup>14</sup>. In Child Health and Mortality Prevention  
298 Surveillance (CHAMPS) study, RSV was found in 5.5% of all deaths, with variability across  
299 countries: 9.7% in Mali, 10.7% in Ethiopia, and a lower 2% in Bangladesh<sup>15</sup>. Half of the deaths in  
300 the CHAMPS study occurred in infants younger than six months.

301  
302 These findings underscore the critical need for maternal immunization strategies, such as  
303 vaccines like ABRYOVO™, which has demonstrated 81.8% efficacy in preventing RSV infections  
304 within the first three months of life<sup>16</sup>. Our estimates suggest that maternal immunization could  
305 potentially reduce the hospital incidence from 465 to 140 cases per 10,000 <5 admissions.

306  
307 Beyond the direct impact of RSV infections, our findings also demonstrate the considerable  
308 burden infections impose on the healthcare system. For a minimum of three months during the  
309 study year, RSV cases occupied more than 20% of the beds under observation, with a median  
310 hospital stay for RSV-positive cases at 5 days—longer than the overall median length of stay of  
311 4 days for all admitted patients. In 2019, RSV cases accounted for 8,274 of the total 151,110  
312 bed days observed. As the largest pediatric tertiary hospital in Bangladesh, BSHI, even with its  
313 total of 653 beds, is insufficient. Consequently, clinicians often must refuse admission due to

314 bed unavailability<sup>10</sup>. We followed over 5,000 admitted and refused children up to 90 days to  
315 determine the difference in health outcomes and the wider effects of high-burden infections  
316 like RSV on the healthcare system. The cumulative mortality proportion for children denied  
317 admission was 19.4%, significantly higher than the 14% among those admitted. This  
318 discrepancy in mortality risk is quantified by a hazard ratio (HR) of 1.69 across all children under  
319 five.

320  
321 The HR for death was 1.37 among children refused admission compared to those admitted,  
322 adjusted for age, diagnosis, and sex. The highest mortality risk was observed in neonates  
323 requiring hospitalization within their first month of life, with a HR of 1.93. This disparity  
324 highlights the essential role of healthcare access in determining child survival outcomes. Monte  
325 Carlo simulation using a 70% efficacious vaccine is estimated to be equivalent to adding  
326 approximately 50 beds to the hospital, and averting 195 deaths in only one hospital, each year.

327  
328 The issue of bed shortages, a prevalent concern across many LMICs, is pressing. In Bangladesh,  
329 the rate of 0.8 beds per 1,000 population is markedly lower than in developed nations such as  
330 2.9 in the USA and 2.5 in the UK<sup>17</sup>. With limited infrastructure, preventative strategies become  
331 even more vital. Over the past decades, the introduction of multiple vaccines in Bangladesh and  
332 improved health systems have led to a decrease in under-5, yet the rate 33 death in 1,000 live  
333 birth remain high, underscoring the need for further disease prevention measures<sup>18</sup>. Given the  
334 considerable proportion of hospital beds occupied by RSV cases during peak periods,  
335 introducing an RSV vaccine could significantly impact bed availability for critically ill infants.  
336 Other interventions like administration of monoclonal antibodies in neonates and infants can  
337 also be considered. However, the cost and logistical hurdles associated with monoclonal  
338 antibody treatments, such as nirsevimab, highlight the need for affordable, scalable, and  
339 equitable solutions, particularly in LMICs like Bangladesh where 69% of health expenditures are  
340 out-of-pocket<sup>19</sup>.

341

342 While our 2019 study centered on RSV, a significant dengue outbreak during the same period  
343 compounded the strain on hospital resources<sup>20</sup>. In addition, other infectious etiologies of  
344 respiratory infections remain to be explored, as evidenced by the high number of cases meeting  
345 the inclusion criteria for RSV October to December, despite the absence of RSV detection.

346  
347 The findings of this study must be viewed considering certain limitations. Primary among them  
348 is the necessity to conduct the study in a single hospital due to the high volume of cases and  
349 the extensive follow-up required for thousands of patients. While the authors' lived  
350 experiences suggest that similar circumstances are likely in other resource-limited settings, a  
351 multi-site research would be helpful in developing a more detailed understanding of the RSV  
352 burden among children throughout Bangladesh and potentially the wider region. Furthermore,  
353 the study's duration was constrained to one year, shortened by the COVID-19 pandemic in the  
354 following year. A longitudinal study spanning multiple years could provide more information on  
355 the patterns of RSV seasonality, but previous reports from Bangladesh suggest an unpredictable  
356 pattern of RSV seasonality<sup>21</sup>. And the overall high burden of RSV in the study hospital aligns  
357 with previous studies<sup>11,12</sup>. This study also did not investigate concurrent infections alongside  
358 RSV, nor was it set up to confirm deaths directly attributable to RSV. Lastly, potential biases due  
359 to human factors may have influenced the clinicians' admissions decisions during times of  
360 resource scarcity, even though such decisions should theoretically be unaffected by bed  
361 availability constraints.

362  
363 The broader context and global health implications of our study are significant. The challenges  
364 highlighted related to shortage of hospital beds in places with high burden of disease are  
365 common in many LMICs and the global health community can learn from these findings  
366 particularly regarding resource allocation and estimate potential impact of preventive  
367 strategies like vaccination. This study also contributes to the growing body of evidence  
368 supporting the development and distribution of RSV vaccines or other interventions, which  
369 could significantly impact child health globally, specifically in low-resource countries where  
370 burden is the highest.

371 **Declaration of Interests**

372 The authors declare no conflict of interest.

373

374 **Author contributions**

375 S.S. contributed to conceptualization, funding acquisition, study design, implementation,  
376 monitoring, data analysis, drafting the initial manuscript, and preparation of figures. S.Sa. was  
377 involved in data analysis, preparation of figures, and manuscript editing. N.K. contributed to  
378 data analysis and editing. Y.H. participated in data analysis, preparation of figures, and  
379 manuscript editing. M.S.I. was responsible for analysis and coordination of the study, and also  
380 contributed to editing. S.I. carried out specimen extraction and PCR testing. Z.B.A. coordinated  
381 and trained doctors and nurses, assisted in the implementation of the study, in addition to  
382 contributing to manuscript editing. M.J.A. was involved in monitoring and management  
383 activities, as well as editing. A.M.A. performed data cleaning. P.K.S. contributed to management  
384 and patient data analysis. M.R.A. was involved in implementation and management. M.R.A.  
385 contributed to editing. S.K.S. contributed to conceptualization, funding acquisition, study  
386 design, implementation, monitoring, and manuscript editing. All authors reviewed the  
387 manuscript and agreed on the contents.

388

389 **Declaration of Generative AI and AI-assisted technologies in the writing process**

390 During the preparation of this work the authors used ChatGPT to check grammar, spellings, and  
391 improve readability of the manuscript. After using this tool/service, the authors reviewed and  
392 edited the content as needed and take full responsibility for the content of the publication.

393

394

395 **References**

396

- 397 1 Li Y, Wang X, Blau DM, *et al.* Global, regional, and national disease burden estimates of acute  
398 lower respiratory infections due to respiratory syncytial virus in children younger than 5  
399 years in 2019: a systematic analysis. *Lancet* 2022; **399**: 2047–64.
- 400 2 Baral R, Higgins D, Regan K, Pecenka C. Impact and cost-effectiveness of potential  
401 interventions against infant respiratory syncytial virus (RSV) in 131 low-income and middle-  
402 income countries using a static cohort model. *BMJ Open* 2021; **11**: e046563.
- 403 3 Muller William J., Madhi Shabir A., Seoane Nuñez Beatriz, *et al.* Nirsevimab for Prevention of  
404 RSV in Term and Late-Preterm Infants. *New England Journal of Medicine* 2023; **388**: 1533–4.
- 405 4 Commissioner O of the. FDA Approves First Vaccine for Pregnant Individuals to Prevent RSV  
406 in Infants. FDA. 2023; published online Aug 22. [https://www.fda.gov/news-events/press-](https://www.fda.gov/news-events/press-announcements/fda-approves-first-vaccine-pregnant-individuals-prevent-rsv-infants)  
407 [announcements/fda-approves-first-vaccine-pregnant-individuals-prevent-rsv-infants](https://www.fda.gov/news-events/press-announcements/fda-approves-first-vaccine-pregnant-individuals-prevent-rsv-infants)  
408 (accessed April 13, 2024).
- 409 5 Zar HJ, Nduru P, Stadler JAM, *et al.* Early-life respiratory syncytial virus lower respiratory tract  
410 infection in a South African birth cohort: epidemiology and effect on lung health. *The Lancet*  
411 *Global Health* 2020; **8**: e1316–25.
- 412 6 Abreo A, Wu P, Donovan BM, *et al.* Infant Respiratory Syncytial Virus Bronchiolitis and  
413 Subsequent Risk of Pneumonia, Otitis Media, and Antibiotic Utilization. *Clin Infect Dis* 2020;  
414 **71**: 211–4.
- 415 7 Feikin DR, Karron RA, Saha SK, *et al.* The full value of immunisation against respiratory  
416 syncytial virus for infants younger than 1 year: effects beyond prevention of acute  
417 respiratory illness. *The Lancet Infectious Diseases* 2023; **0**. DOI:10.1016/S1473-  
418 3099(23)00568-6.
- 419 8 Bangladesh | Gavi, the Vaccine Alliance. 2018; published online Nov 29.  
420 <https://www.gavi.org/programmes-impact/country-hub/south-east-asia/bangladesh>  
421 (accessed April 13, 2024).

- 422 9 Islam SMS, Uddin R, Das S, *et al.* The burden of diseases and risk factors in Bangladesh, 1990–  
423 2019: a systematic analysis for the Global Burden of Disease Study 2019. *The Lancet Global*  
424 *Health* 2023; **11**: e1931–42.
- 425 10 Saha S, Santosham M, Hussain M, Black RE, Saha SK. Rotavirus Vaccine will Improve Child  
426 Survival by More than Just Preventing Diarrhea: Evidence from Bangladesh. *Am J Trop Med*  
427 *Hyg* 2018; **98**: 360–3.
- 428 11 Saha SK, Schrag SJ, El Arifeen S, *et al.* Causes and incidence of community-acquired serious  
429 infections among young children in south Asia (ANISA): an observational cohort study. *The*  
430 *Lancet* 2018; **392**: 145–59.
- 431 12 O'Brien KL, Baggett HC, Brooks WA, *et al.* Causes of severe pneumonia requiring hospital  
432 admission in children without HIV infection from Africa and Asia: the PERCH multi-country  
433 case-control study. *The Lancet* 2019; **394**: 757–79.
- 434 13 Case definitions. [https://www.who.int/teams/global-influenza-programme/global-](https://www.who.int/teams/global-influenza-programme/global-respiratory-syncytial-virus-surveillance/case-definitions)  
435 [respiratory-syncytial-virus-surveillance/case-definitions](https://www.who.int/teams/global-influenza-programme/global-respiratory-syncytial-virus-surveillance/case-definitions) (accessed Jan 6, 2024).
- 436 14 Gill CJ, Mwananyanda L, MacLeod WB, *et al.* Infant deaths from respiratory syncytial virus in  
437 Lusaka, Zambia from the ZPRIME study: a 3-year, systematic, post-mortem surveillance  
438 project. *The Lancet Global Health* 2022; **10**: e269–77.
- 439 15 Blau DM, Baillie VL, Els T, *et al.* Deaths Attributed to Respiratory Syncytial Virus in Young  
440 Children in High-Mortality Rate Settings: Report from Child Health and Mortality Prevention  
441 Surveillance (CHAMPS). *Clin Infect Dis* 2021; **73**: S218–28.
- 442 16 Fleming-Dutra KE, Jones JM, Roper LE, *et al.* Use of the Pfizer Respiratory Syncytial Virus  
443 Vaccine During Pregnancy for the Prevention of Respiratory Syncytial Virus-Associated Lower  
444 Respiratory Tract Disease in Infants: Recommendations of the Advisory Committee on  
445 Immunization Practices - United States, 2023. *MMWR Morb Mortal Wkly Rep* 2023; **72**:  
446 1115–22.



- 447 17 World Bank Open Data. World Bank Open Data. <https://data.worldbank.org> (accessed April  
448 21, 2024).
- 449 18 SDG Tracker. <https://sdg.gov.bd/page/indicator-wise/1/30/3/0#1> (accessed April 21, 2024).
- 450 19 2023-05-31-17-02-bed461250ff1b439a0338ab3ddfea682.pdf.  
451 [https://heu.portal.gov.bd/sites/default/files/files/heu.portal.gov.bd/page/364480c2\\_26f9\\_4](https://heu.portal.gov.bd/sites/default/files/files/heu.portal.gov.bd/page/364480c2_26f9_4bbb_bf71_8b4ac613d96a/2023-05-31-17-02-bed461250ff1b439a0338ab3ddfea682.pdf)  
452 [bbb\\_bf71\\_8b4ac613d96a/2023-05-31-17-02-bed461250ff1b439a0338ab3ddfea682.pdf](https://heu.portal.gov.bd/sites/default/files/files/heu.portal.gov.bd/page/364480c2_26f9_4bbb_bf71_8b4ac613d96a/2023-05-31-17-02-bed461250ff1b439a0338ab3ddfea682.pdf)  
453 (accessed April 14, 2024).
- 454 20 Yesmin S, Sarmin S, Ahammad AM, Rafi MdA, Hasan MJ. Epidemiological Investigation of the  
455 2019 Dengue Outbreak in Dhaka, Bangladesh. *J Trop Med* 2023; **2023**: 8898453.
- 456 21 Hossain ME, Rahman MZ, Islam MdM, *et al.* Pre COVID-19 molecular epidemiology of  
457 respiratory syncytial virus (RSV) among children in Bangladesh. *Heliyon* 2022; **8**: e11043.
- 458  
459  
460

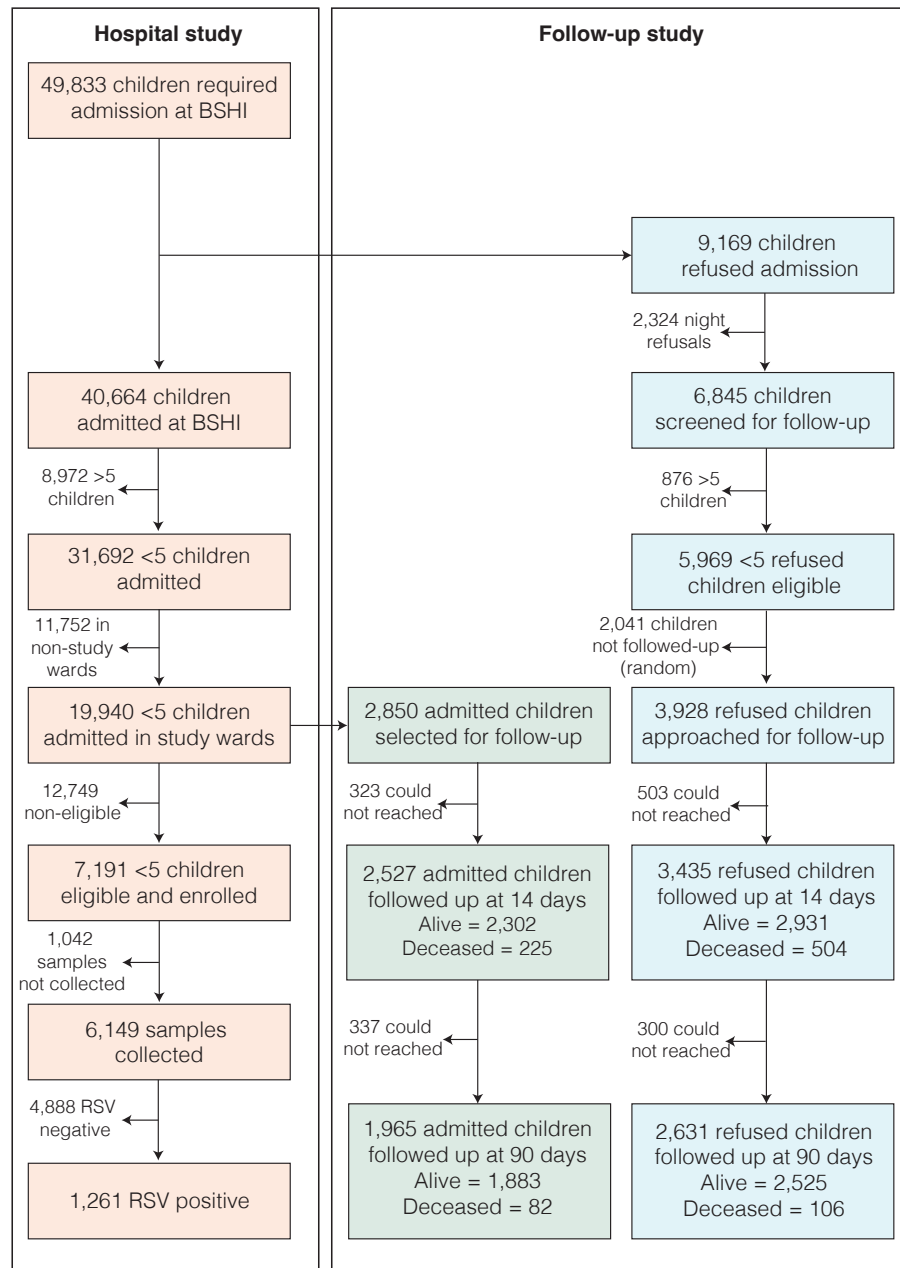

**Figure 1. Flowchart of Sample Collection and Patient Follow-Up.**

The figure illustrates the process of sample collection and subsequent patient follow-up for children under five admitted to BSHI or refused admission due to unavailability of bed. Reasons for failures of sample collection and details on those lost to follow-up are provided in Supplementary Appendix Tables S2, S4 - S7.

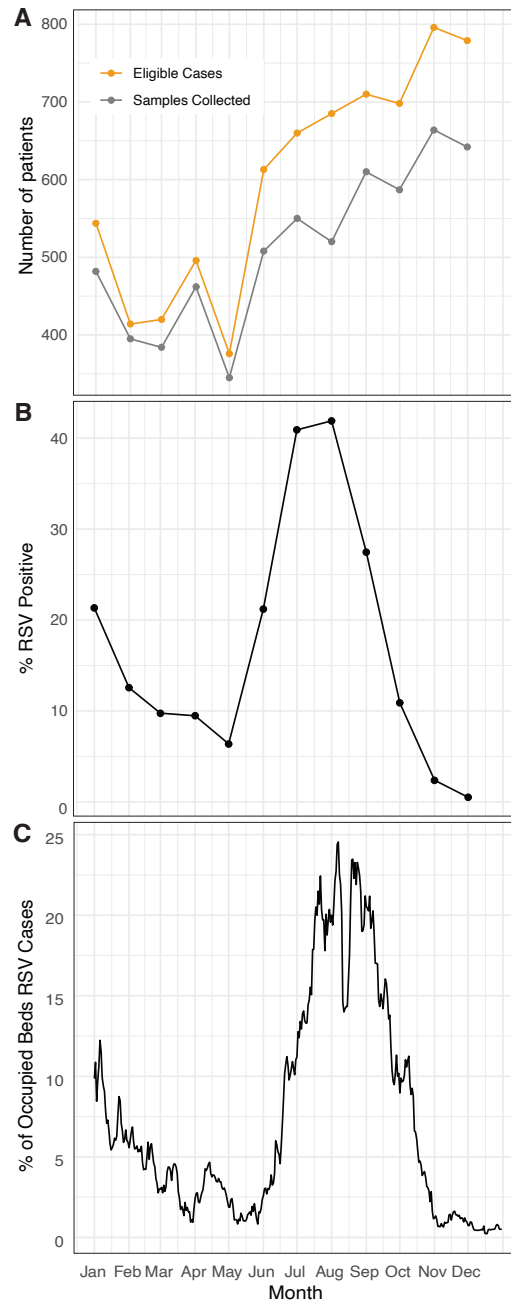

**Figure 2. RSV Infections and Bed Occupancy in BSHI in 2019.**

A. The total number of patients enrolled into the study each month, and the number of samples collected from these patients. B. Percentage of RSV positive cases detected each month. C. Percentage of occupied beds with RSV positive cases across different months. The dip in bed occupancy seen in mid-August is because of Eid-ul-Adha holidays.

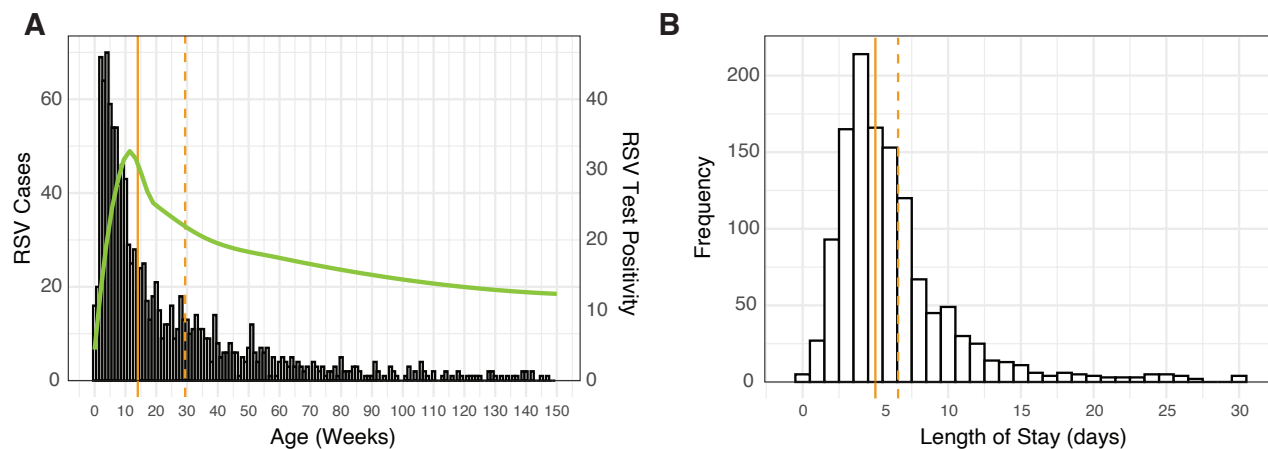

**Figure 3. Age distribution of RSV cases and length of hospital stay.** A. Age distribution of RSV cases ( $n = 1,261$ ) in weeks, where the green line represents RSV test positivity in different age groups, the solid orange line indicates the median age, and the dotted orange line shows the mean age. B. Length of hospital stay in days of RSV cases ( $n = 1,261$ ), with the solid orange line representing the median length of stay and the dotted orange line the mean.

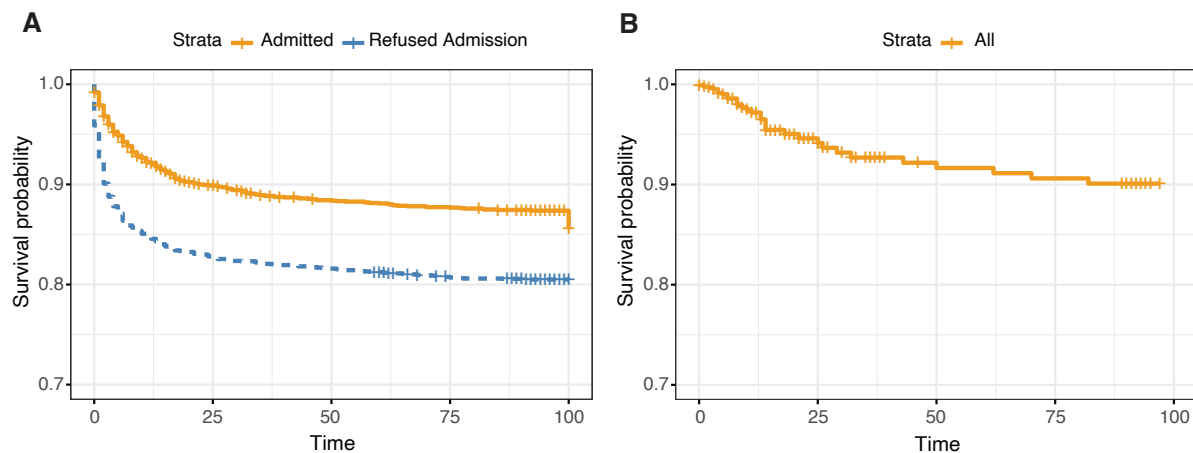

**Figure 4. Survival Analysis of Patients followed-up.**

A. Survival probabilities of patients who were refused admission with those who were admitted. Cases were censored at discharge if there was no follow-up or at the last successful follow-up.

B. Survival curve for only RSV-positive cases: the 24 cases that resulted in in-hospital deaths, alongside the additional 205 cases that were followed up, of whom 18 subsequently died.

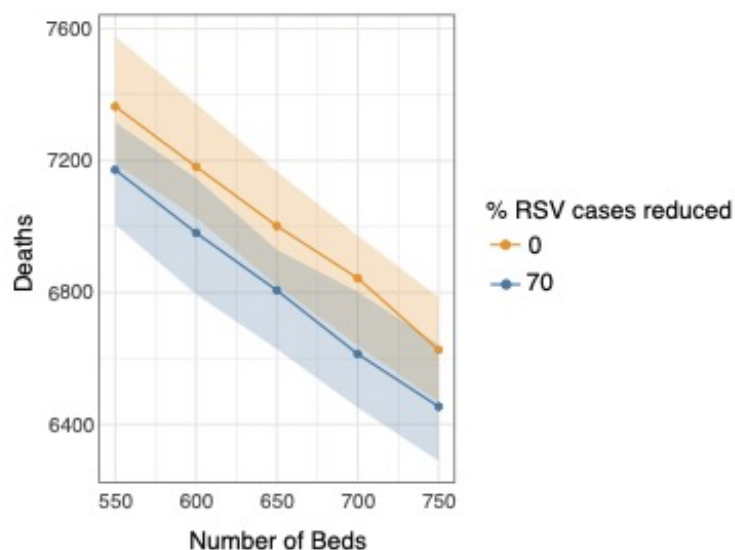

**Figure 5. Impact of RSV Vaccination on Hospital Utilization and 90-day Mortality Rates of all children who require admission at BSHI.** Effects of a 70% reduction in RSV admissions through vaccination, showing its impact on deaths and hospital bed utilization among children under five. The plot compares mortality against the effective increase in available beds, demonstrating how reducing RSV cases is akin to increasing bed capacity.

**Table 1: Clinical attributes study participants enrolled in the study stratified by RSV status.**

|                                           | <b>Overall</b>     | <b>RSV<br/>Negative/ Not<br/>Tested</b> | <b>RSV Positive</b> | <b>p</b> |
|-------------------------------------------|--------------------|-----------------------------------------|---------------------|----------|
| <b>Number of Patients</b>                 | <b>19940</b>       | <b>18679</b>                            | <b>1261</b>         |          |
| <b>Sex - Female (%)</b>                   | 7582 (38.0)        | 7196 (38.5)                             | 386 (30.6)          | <0.001   |
| <b>Age in months (median [IQR])</b>       | 5.00 [0.00, 16.00] | 5.00 [0.00, 17.00]                      | 3.00 [1.00, 8.00]   | <0.001   |
| <b>&lt; 2 wks</b>                         | 5364 (26.9)        | 5293 (28.3)                             | 71 ( 5.6)           |          |
| <b>2 wks - 3 mnths</b>                    | 4039 (20.3)        | 3413 (18.3)                             | 626 (49.6)          |          |
| <b>4 - 6 mnths</b>                        | 1648 ( 8.3)        | 1464 ( 7.8)                             | 184 (14.6)          |          |
| <b>7 mnths - 2 yrs</b>                    | 5693 (28.6)        | 5381 (28.8)                             | 312 (24.7)          |          |
| <b>2 - 5yrs</b>                           | 3196 (16.0)        | 3128 (16.7)                             | 68 ( 5.4)           |          |
| <b>In-hospital mortality (%)</b>          | 1266 ( 6.3)        | 1242 ( 6.6)                             | 24 ( 1.9)           | <0.001   |
| <b>Length of Stay (median [IQR])</b>      | 4.00 [2.00, 7.00]  | 4.00 [2.00, 7.00]                       | 5.00 [4.00, 8.00]   | <0.001   |
| <b>Diagnosis Cluster (%)</b>              |                    |                                         |                     | <0.001   |
| <b>Respiratory Manifestation</b>          | 5026 (25.2)        | 4065 (21.8)                             | 961 (76.2)          |          |
| <b>Gastrointestinal<br/>Manifestation</b> | 2192 (11.0)        | 2178 (11.7)                             | 14 ( 1.1)           |          |
| <b>Perinatal Asphyxia</b>                 | 2178 (10.9)        | 2164 (11.6)                             | 14 ( 1.1)           |          |
| <b>Febrile Illness</b>                    | 1464 ( 7.3)        | 1445 ( 7.7)                             | 19 ( 1.5)           |          |
| <b>Systemic Infections</b>                | 1421 ( 7.1)        | 1352 ( 7.2)                             | 69 ( 5.5)           |          |
| <b>Preterm low-birth weight</b>           | 899 ( 4.5)         | 887 ( 4.7)                              | 12 ( 1.0)           |          |
| <b>Other</b>                              | 6758 (33.9)        | 6586 (35.3)                             | 172 (13.6)          |          |

**Table 2: Clinical attribute and outcome of participants admitted or refused admissions who were followed-up.**

The table represents data of participants for whom data could be collected. Diagnoses was could not be collected for 18% of participants, 14-day mortality was missing for 12% and 90-day mortality was missing for 21%.

|                                       | <b>Overall</b>     | <b>Admitted</b>    | <b>Refused</b>     | <b>p-value</b> |
|---------------------------------------|--------------------|--------------------|--------------------|----------------|
| <b>Number of Patients</b>             | <b>6772</b>        | <b>2845</b>        | <b>3927</b>        |                |
| <b>Sex - Female (%)</b>               | 2582 (38.1)        | 1071 (37.6)        | 1511 (38.5)        | 0.502          |
| <b>Age in months (median [IQR])</b>   | 3.00 [0.00, 12.00] | 4.00 [0.00, 15.00] | 3.00 [0.00, 11.00] | 0.006          |
| <b>&lt; 2 wks</b>                     | 2017 (29.8)        | 804 (28.3)         | 1213 (30.9)        | <0.001         |
| <b>2 wks - 3 mnths</b>                | 1430 (21.1)        | 600 (21.1)         | 830 (21.1)         |                |
| <b>4 - 6 mnths</b>                    | 622 ( 9.2)         | 226 ( 7.9)         | 396 (10.1)         |                |
| <b>7 mnths - 2 yrs</b>                | 1869 (27.6)        | 764 (26.9)         | 1105 (28.1)        |                |
| <b>2 - 5yrs</b>                       | 834 (12.3)         | 451 (15.9)         | 383 ( 9.8)         |                |
| <b>ER Diagnosis Cluster (%)</b>       |                    |                    |                    |                |
| <b>Respiratory Manifestation</b>      | 1463 (26.5)        | 351 (20.1)         | 1112 (29.4)        |                |
| <b>Gastrointestinal Manifestation</b> | 475 ( 8.6)         | 182 (10.4)         | 293 ( 7.8)         |                |
| <b>Perinatal Asphyxia</b>             | 702 (12.7)         | 211 (12.1)         | 491 (13.0)         |                |
| <b>Febrile Illness</b>                | 207 ( 3.7)         | 101 ( 5.8)         | 106 ( 2.8)         | <0.001         |
| <b>Systemic Infections</b>            | 496 ( 9.0)         | 145 ( 8.3)         | 351 ( 9.3)         |                |
| <b>Preterm low-birth weight</b>       | 382 ( 6.9)         | 78 ( 4.5)          | 304 ( 8.0)         |                |
| <b>Other</b>                          | 1799 (32.6)        | 677 (38.8)         | 1122 (29.7)        |                |
| <b>14-day Mortality (%)</b>           | 729 (12.2)         | 225 ( 8.9)         | 504 (14.7)         | <0.001         |
|                                       |                    |                    |                    |                |
| <b>90-day Mortality (%)</b>           | 917 (17.2)         | 307 (14.0)         | 610 (19.4)         | <0.001         |



**Table 3: Hazard ratio (HR) of refused vs admitted participants adjusted by age, sex, and diagnosis.**

| Adjusted by                | Strata                         | HR [95% CI]              |
|----------------------------|--------------------------------|--------------------------|
|                            |                                | <b>1.69 [1.48, 1.69]</b> |
| <b>Age, Sex, Diagnosis</b> |                                | <b>1.56 [1.36, 1.79]</b> |
| <b>Sex, Diagnosis</b>      | < 1 mnth                       | <b>1.93 [1.62, 2.3]</b>  |
| <b>Sex, Diagnosis</b>      | 2-3 mnths                      | 1.19 [0.89, 1.58]        |
| <b>Sex, Diagnosis</b>      | 4 mnths - 1 yr                 | 1.47 [0.87, 2.48]        |
| <b>Sex, Diagnosis</b>      | 1-5 yrs                        | 1.05 [0.66, 1.68]        |
| <b>Age, Diagnosis</b>      | Male                           | <b>1.59 [1.34, 1.9]</b>  |
| <b>Age, Diagnosis</b>      | Female                         | <b>1.49 [1.2, 1.84]</b>  |
| <b>Age, Sex</b>            | Respiratory Manifestation      | 0.96 [0.7, 1.31]         |
| <b>Age, Sex</b>            | Perinatal Asphyxia             | <b>2.22 [1.68, 2.92]</b> |
| <b>Age, Sex</b>            | Systemic Infections            | <b>1.79 [1.13, 2.85]</b> |
| <b>Age, Sex</b>            | Preterm low-birth weight       | <b>1.85 [1.32, 2.59]</b> |
| <b>Age, Sex</b>            | Febrile Illness                | 0.79 [0.14, 4.37]        |
| <b>Age, Sex</b>            | Gastrointestinal Manifestation | 1.37 [0.51, 3.71]        |
| <b>Age, Sex</b>            | Other                          | <b>1.32 [1.02, 1.71]</b> |
